# Supplementary material for: Identification of Candidate Genes for Rind Color and Bloom Formation in Watermelon Fruits Based on a Quantitative Trait Locus-Seq
Source: MDPI journal article supplement (doi:10.3390/plants11202739), 2022-10-17
Supplement: s1 [file s1]

Table S3. Statistics of sequencing data of raw read and genome coverage of trimmed read after equalizing.

| DNA samples | No. of F <sub>2</sub> plants<br>in bulk | No. of reads | Average<br>length(bp) | Total length(bp) | Q30(%) <sup>z</sup> | Coverage <sup>y</sup> | Coverage <sup>y</sup><br>after equalizing |
|-------------|-----------------------------------------|--------------|-----------------------|------------------|---------------------|-----------------------|-------------------------------------------|
| SIT55616RN  | -                                       | 23,238,593   | 151                   | 3,509,027,543    | 93.57               | ≈16.51X               |                                           |
|             |                                         | 23,238,593   |                       | 3,509,027,543    |                     |                       |                                           |
| FD061129    | -                                       | 22,901,520   | 151                   | 3,458,129,520    | 93.28               | ≈16.27X               |                                           |
|             |                                         | 22,901,520   |                       | 3,458,129,520    |                     |                       |                                           |
| DG-bulk     | 40                                      | 64,221,090   | 151                   | 9,697,384,590    | 94.83               | ≈45.63X               | ≈34.54X                                   |
|             |                                         | 64,221,090   |                       | 9,697,384,590    |                     |                       |                                           |
| LG-bulk     | 9                                       | 62,602,038   | 151                   | 9,452,907,738    | 94.73               | ≈44.48X               | ≈34.54X                                   |
|             |                                         | 62,602,038   |                       | 9,452,907,738    |                     |                       |                                           |
| B-bulk      | 40                                      | 62,733,048   | 151                   | 9,472,690,248    | 94.35               | ≈44.85X               | ≈33.86X                                   |
|             |                                         | 62,733,048   |                       | 9,472,690,248    |                     |                       |                                           |
| Bl-bulk     | 40                                      | 63,529,167   | 151                   | 9,592,904,217    | 94.5                | ≈45.14X               | ≈33.86X                                   |
|             |                                         | 63,529,167   |                       | 9,592,904,217    |                     |                       |                                           |

<sup>z</sup> Ratio of bases that have quality score of over 30.

<sup>y</sup> Total raw read length of each sample divided by estimated genome size (425 Mb).
