# Supplementary material for: Identification of Candidate Genes for Rind Color and Bloom Formation in Watermelon Fruits Based on a Quantitative Trait Locus-Seq
Source: MDPI journal article supplement (doi:10.3390/plants11202739), 2022-10-17
Supplement: s1 [file s1]

Table S4. Statistics of Single nucleotide polymorphism calling for bulked DNA samples.

| Chromosome.      | No. of SNPs for rind color |         |            | No. of SNPs for bloom |         |            |
|------------------|----------------------------|---------|------------|-----------------------|---------|------------|
|                  | DG-bulk                    | LG-bulk | comparable | B-bulk                | BI-bulk | comparable |
| 1                | 6,968                      | 7,129   | 7,043      | 7,132                 | 6,770   | 7,103      |
| 2                | 16,576                     | 15,805  | 16,843     | 16,823                | 16,382  | 17,053     |
| 3                | 8,745                      | 7,283   | 8,564      | 8,483                 | 8,664   | 8,727      |
| 4                | 12,904                     | 12,534  | 13,163     | 13,123                | 12,989  | 13,451     |
| 5                | 25,438                     | 24,781  | 25,806     | 25,690                | 25,223  | 25,981     |
| 6                | 13,029                     | 8,864   | 12,975     | 12,823                | 13,082  | 13,275     |
| 7                | 19,911                     | 20,079  | 20,432     | 20,412                | 20,175  | 20,535     |
| 8                | 9,239                      | 7,902   | 9,084      | 8,859                 | 9,153   | 9,183      |
| 9                | 27,646                     | 25,043  | 27,529     | 27,036                | 27,646  | 27,766     |
| 10               | 7,322                      | 7,197   | 7,118      | 7,184                 | 7,213   | 7,130      |
| 11               | 8,271                      | 7,606   | 8,267      | 8,568                 | 8,376   | 8,558      |
| Scaffolds(102ea) | 870                        | 938     | 932        | 922                   | 884     | 930        |
| Total            | 156,919                    | 145,161 | 157,756    | 157,055               | 156,557 | 159,692    |
